# Supplementary material
Source: publisher figshare collection journal article supplement (https://karger.figshare.com/articles/dataset/_/12587702)
Supplement: Supplementary file 1 [file 1]

## Study design stakeholders

Information technology

Medical devices

Drug development

Sensor technology

Application development

Patients with HF

Big-data sciences

Trial logistics

Healthcare professionals

Objective parameters

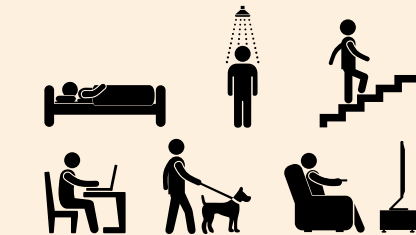

Continuous, real-world monitoring data

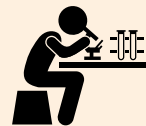

Laboratory test data

Activity

Vital signs

Physiological measures

6MWD, biomarkers, etc.

Subjective parameters

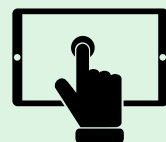

ePRO data

Mobility, QoL, etc.

# REALisM-HF

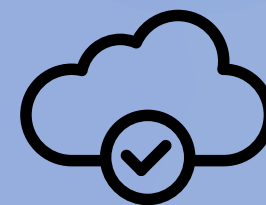

Cloud storage

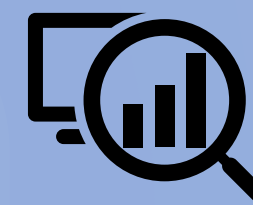

Analysis

Inform

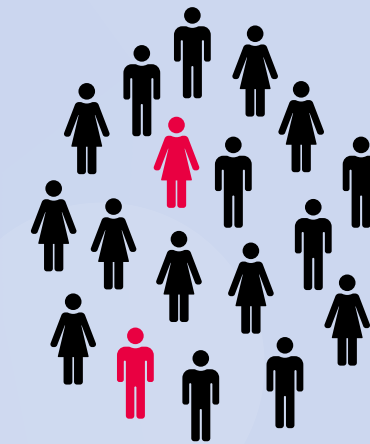

Clinical trial design

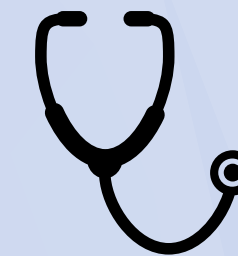

Patient management
